# Supplementary material
Source: Research Square preprint supplement (doi:10.21203/rs.3.rs-8960457/v1)
Supplement: Supplementary file 1 [file 4d9202f97beda606d55ced70.xlsx]

## Sheet: Table1
Additional Table 1 Locality details of the sampled and sequenced individuals
species	country	locality	habitat	substrate	latitude	longitude	altitude	chromosome number	Ploidy level	voucher PRC	population code	Individual code (PacBio)	Individual(s) code (HiC)	Individuals code (RNA seq)
Aethionema saxatile	GR	Vasilitsa, above the road W of the saddle	eroded slopes above the road in subalpine grassland	serpentine	40.05536	21.07547	1753	2n = 24	diploid	PRC 488170	A043	XA86	XA86+XA90	XA472, XA691 (flower)
Cardamine glauca	GR	Vasilitsa, above road from Smixi to teh saddle	eroded slopes above the road in open forest	serpentine	40.05468	21.09016	1730	2n = 16	diploid	PRC 488169	C037	XC99	XC097	XC174, XC618 (flower)
Erysimum linariifolium	SRB	Brdjanska klisura	rock steppe	serpentine	43.9888	20.4213583	285	2n=14	diploid	PRC 488168	E014	XE008	XE008+XE009	XE263, XE774 (flower)
Noccaea praecox	SRB	Divčibare	open deciduous forest	serpentine	44.11718	19.97377	1030	2n=14	diploid	PRC 488171	N092	XN107	XN104+XN105	XN580
Odontarrhena muralis	SRB	Užice, ridges above the castle	rocky scree and rocks	limestone	43.8507919	19.8245121	433	2n=16	diploid	PRC 488172	O022	XO109	XO110	XO467, XO772 (flower)

## Sheet: Table2
Additional Table 2: PacBio HiFi Sequencing Summary
		Total HiFi data (Gb)	Numbe of reads	Read N50	Fold coverage (x). total data/GS2 haploid length
Aethionema saxatile	XA86	28	1673279	17444	109
Cardamine glauca	XC99	30	1822931	17676	133
Erysimum linariifolium	XE008	26	1748157	15303	155
Noccaea praecox	XN107	31	1783541	17669	148
Odontarrhena muralis	XO109	46	2847277	16288	242

## Sheet: Table3
Additional Table 3: Hi-C Sequencing Data Summary
	Individual(s)	Total bases (Gb) sum length from seqkit *2.	Read pair (number of reads in one pair (R1)	Read length
Aethionema saxatile	XA86+XA90	35	117591907	PE150
Cardamine glauca	XC097	33	113009371	PE150
Erysimum linariifolium	XE008+XE009	24	80160238	PE150
Noccaea praecox	XN104+XN105	33	110562267	PE150
Odontarrhena muralis	XO110	30	101558928	PE150

## Sheet: Table4
Additional Table 4: RNA-seq Sample Metadata
sample code	individual	species	tissue	pop	pop_name	sample type	isolation kit	seq company
XA472_L	XA472	Aethionema saxatile	leaves	A043	Vasilitsa	sown from field collected seeds	Nucleospin RNA Plus (Macherey-Nagel)	Novogene
XA472_R	XA472	Aethionema saxatile	roots	A043	Vasilitsa	sown from field collected seeds	Nucleospin RNA Plus (Macherey-Nagel)	Novogene
XA472_S	XA472	Aethionema saxatile	stem	A043	Vasilitsa	sown from field collected seeds	Nucleospin RNA Plus (Macherey-Nagel)	Novogene
XA472L	XA472	Aethionema saxatile	leaves	A043	Vasilitsa	sown from field collected seeds	Nucleospin RNA Plus (Macherey-Nagel)	Macrogen
XA691_F	XA691	Aethionema saxatile	flower	A082	Vourinos	sown from field collected seeds	Nucleospin RNA Plus (Macherey-Nagel)	Novogene
XC174_OL	XC174	Cardamine glauca	old leaves	C037	Vasilitsa	sown from field collected seeds	Nucleospin RNA Plus (Macherey-Nagel)	Novogene
XC174_YL	XC174	Cardamine glauca	young leaves	C037	Vasilitsa	sown from field collected seeds	Nucleospin RNA Plus (Macherey-Nagel)	Novogene
XC174_R	XC174	Cardamine glauca	roots	C037	Vasilitsa	sown from field collected seeds	Nucleospin RNA Plus (Macherey-Nagel)	Novogene
XC174_S	XC174	Cardamine glauca	stem	C037	Vasilitsa	sown from field collected seeds	Nucleospin RNA Plus (Macherey-Nagel)	Novogene
XC174YL	XC174	Cardamine glauca	young leaves	C037	Vasilitsa	sown from field collected seeds	Nucleospin RNA Plus (Macherey-Nagel)	Macrogen
XC618_F	XC618	Cardamine glauca	flower	C037	Vasilitsa	sown from field collected seeds	Nucleospin RNA Plus (Macherey-Nagel)	Novogene
XC618_FB	XC618	Cardamine glauca	flower buds	C037	Vasilitsa	sown from field collected seeds	Nucleospin RNA Plus (Macherey-Nagel)	Novogene
XE263_OL	XE263	Erysimum linariifolium	old leaves	E014	Brdjanska klisura	sown from field collected seeds	Nucleospin RNA Plus (Macherey-Nagel)	Novogene
XE263_YL	XE263	Erysimum linariifolium	young leaves	E014	Brdjanska klisura	sown from field collected seeds	Nucleospin RNA Plus (Macherey-Nagel)	Novogene
XE263_R	XE263	Erysimum linariifolium	roots	E014	Brdjanska klisura	sown from field collected seeds	Nucleospin RNA Plus (Macherey-Nagel)	Novogene
XE263_S	XE263	Erysimum linariifolium	stem	E014	Brdjanska klisura	sown from field collected seeds	Nucleospin RNA Plus (Macherey-Nagel)	Novogene
XE263OL	XE263	Erysimum linariifolium	old leaves	E014	Brdjanska klisura	sown from field collected seeds	Nucleospin RNA Plus (Macherey-Nagel)	Macrogen
XE774_F	XE774	Erysimum linariifolium	flower	E014	Brdjanska klisura	sown from field collected seeds	Nucleospin RNA Plus (Macherey-Nagel)	Novogene
XN580_F	XN580	Noccaea praecox	flowers	N092	Divcibare	sown from field collected seeds	Nucleospin RNA Plus (Macherey-Nagel)	Novogene
XN580_FB	XN580	Noccaea praecox	flower buds	N092	Divcibare	sown from field collected seeds	Nucleospin RNA Plus (Macherey-Nagel)	Novogene
XN580_L	XN580	Noccaea praecox	leaves	N092	Divcibare	sown from field collected seeds	Nucleospin RNA Plus (Macherey-Nagel)	Novogene
XN580_R	XN580	Noccaea praecox	roots	N092	Divcibare	sown from field collected seeds	Nucleospin RNA Plus (Macherey-Nagel)	Novogene
XN580_S	XN580	Noccaea praecox	stem	N092	Divcibare	sown from field collected seeds	Nucleospin RNA Plus (Macherey-Nagel)	Novogene
XO467_OL	XO467	Odontarrhena muralis	old leaves	O022	Užice	sown from field collected seeds	Nucleospin RNA Plus (Macherey-Nagel)	Novogene
XO467_YL	XO467	Odontarrhena muralis	young leaves	O022	Užice	sown from field collected seeds	Nucleospin RNA Plus (Macherey-Nagel)	Novogene
XO467_R	XO467	Odontarrhena muralis	roots	O022	Užice	sown from field collected seeds	Nucleospin RNA Plus (Macherey-Nagel)	Novogene
XO467_S	XO467	Odontarrhena muralis	stem	O022	Užice	sown from field collected seeds	Nucleospin RNA Plus (Macherey-Nagel)	Novogene
XO467R	XO467	Odontarrhena muralis	root	O022	Užice	sown from field collected seeds	Nucleospin RNA Plus (Macherey-Nagel)	Macrogen
XO772_F	XO772	Odontarrhena muralis	flower	O225	Sokobanja	sown from field collected seeds	Nucleospin RNA Plus (Macherey-Nagel)	Novogene
SRR24947461		Noccaea praecox	leaves		Žerjav	https://doi.org/10.1038/s41597-023-02776-x
SRR24947462		Noccaea praecox	leaves		Žerjav	https://doi.org/10.1038/s41597-023-02776-x
SRR24947463		Noccaea praecox	leaves		Žerjav	https://doi.org/10.1038/s41597-023-02776-x
SRR24947464		Noccaea praecox	leaves		Lokovec	https://doi.org/10.1038/s41597-023-02776-x
SRR24947465		Noccaea praecox	leaves		Lokovec	https://doi.org/10.1038/s41597-023-02776-x
SRR24947466		Noccaea praecox	leaves		Lokovec	https://doi.org/10.1038/s41597-023-02776-x

## Sheet: Table5
Table 5: Results of BUSCO analysis for annotation of genomes. Sequences of all proteins (including alternative transcripts) were used, causing an increase in reported amount of duplicated BUSCO genes.
	Aethionema saxatile	Cardamine glauca	Erysimum linariifolium	Noccaea praecox	Odontarrhena muralis
Complete (%)	95.9	98.1	98.5	97.6	97.5
Single (%)	80.5	83.9	85.6	82.4	82.6
Duplicated (%)	15.4	14.2	12.9	15.2	14.9
Fragmented (%)	0.3	0.1	0.2	0.3	0.2
Missing (%)	3.8	1.8	1.3	2.1	2.3
